# Supplementary material
Source: Research Square preprint supplement (doi:10.21203/rs.3.rs-9790284/v1)
Supplement: Supplementary file 1 [file cbb15407636cb93c874acf44.docx]

**Supplementary table1.** Summary of Clinically Actionable Genomic Findings and Resulting Precision Medicine Applications.

| **Case ID** | **Age at Diagnosis** | **Gene** | **Phenotype** | **Possible Clinical Intervention** |
| --- | --- | --- | --- | --- |
| RB24.02 | 15 years | *VWF* | Von Willebrand Disease | Factor replacement therapy and Desmopressin (DDAVP) administration |
| *BTD*RB24.51 | 1 year |  | Biotinidase Deficiency | Immediate initiation of high-dose oral Biotin supplementation. |
| RB24.69 | 9 years | *MT-CO1, MT-CO3, MT-ND3, MT-CYB, MT-ND4, MT-CO2, MT-ND5, MT-ATP6, MT-ND1, MT-ND6, MT-ND2, MT-ATP8* | Mitochondrial Myopathy / Kearns-Sayre Syndrome | Targeted Coenzyme Q10 and antioxidant supplementation. |
| RB25.21 | 1 year | *PEX16* | Zellweger Spectrum Disorder | Fat-soluble vitamin and bile acid replacement therapy. |
| RB25.23 | 17 years | *MRPL49* | Combined Oxidative Phosphorylation Deficiency | Targeted metabolic supplementation (Riboflavin/CoQ10). |
| RB25.48 | 26 years | *SLC37A4* | Glycogen Storage Disease Ib | Strict cornstarch dietary protocol and G-CSF therapy. |
| RB25.85 | 9-months | *MMAB* | Methylmalonic Aciduria | Protein-restricted diet and Vitamin B12 (Cobalamin) therapy. |
| RB25.86 | 6 years | *PAH* | Phenylketonuria (PKU) | Phenylalanine-restricted diet and Sapropterin (BH4) therapy. |
| RB25.94 | 1 year | *GBA1* | Gaucher Disease | Enzyme Replacement Therapy (ERT) or Substrate Reduction Therapy (SRT). |
| RB25.106 | 3 years | *SLC7A7* | Lysinuric Protein Intolerance | Low-protein diet and oral Citrulline supplementation. |
| RB25.117 | 7 years | *DMD* | Duchenne/Becker Muscular Dystrophy | Initiation of corticosteroid therapy (Prednisolone/Deflazacort). |
| RB25.144 | 6 years | *TTC19* | Mitochondrial Complex III Deficiency | Targeted metabolic supplementation (Antioxidant/Coenzyme therapy). |
